# Supplementary material for: Transcriptome analysis of the effect of C-C chemokine receptor 5 deficiency on cell response to Toxoplasma gondii in brain cells
Source: BMC Genomics. 2019 Sep 11;20:705. doi: 10.1186/s12864-019-6076-4 (PMC6737708; doi:10.1186/s12864-019-6076-4)
Supplement: Supplementary file 1 — Additional file 1: Table S1. Detailed expression data for DEGs in which upregulation during T. gondii infection was impaired by CCR5-deficiency. (XLSX 67 kb) [file 12864_2019_6076_MOESM1_ESM.xlsx]

## Sheet: Astrocyte
DEGs in which upregulation during T. gondii infection was impaired by CCR5-deficiency in astrocytes
*FDR was not calculated because no reads were mapped in some samples.
id	Symbol	uninfected WT vs infected WT		uninfected KO vs infected KO		uninfected WT vs uninfected KO		infected WT vs infected KO		Fold change between "uninfected WT vs infected WT" vs "uninfected KO vs infected KO"	mean iDEGES-normalized count
		log2FoldChange	FDR	log2FoldChange	FDR	log2FoldChange	FDR	log2FoldChange	FDR		uninfected WT	infected WT	uninfected KO	infected KO
ENSMUSG00000064246	Chi3l1	3.69183	0	3.15628	1.31378e-45	1.60224	4.25858e-13	2.12866	8.43564e-225	0.689896	180.873	2346.71	55.5895	504.64
ENSMUSG00000027832	Ptx3	3.50545	0	3.25285	1.49398e-107	1.23204	1.94266e-17	1.47652	2.32224e-197	0.83938	373.155	4256.2	147.62	1439.7
ENSMUSG00000001156	Mxd1	1.43983	9.39203e-140	1.04908	1.99082e-09	0.95886	6.57847e-14	1.34131	8.71286e-68	0.762732	456.888	1245.06	216.665	460.355
ENSMUSG00000032174	Icam5	2.1301	2.92276e-27	1.32328	0.0577802	0.566688	0.348715	1.31832	5.93702e-08	0.57164	29.8277	131.331	19.0568	46.7349
ENSMUSG00000040026	Saa3	6.49231	1.28896e-32	5.42066	1.1448e-05	-0.0323707	*	1.25059	4.82277e-08	0.475775	1.60851	145.125	1.95272	58.2258
ENSMUSG00000008193	Spib	8.56833	7.02282e-38	7.68426	6.32131e-09	0.369989	*	1.23757	1.65854e-19	0.541835	1.01448	382.637	0.650263	152.354
ENSMUSG00000056258	Kcnq3	3.13361	3.61306e-56	2.77333	1.85095e-06	0.778995	0.342587	1.20218	1.25227e-09	0.779015	20.5556	181.941	12.0188	77.3135
ENSMUSG00000040264	Gbp5	8.08046	0	7.77497	1.06742e-57	0.89827	0.339613	1.18547	1.1349e-106	0.809163	12.6243	3437.85	5.81872	1442.76
ENSMUSG00000052981	Ube2ql1	2.00217	3.03522e-101	0.555943	0.0292705	-0.285243	0.213961	1.15867	6.45045e-27	0.36698	147.73	593.853	167.564	253.095
ENSMUSG00000005413	Hmox1	1.37903	4.167e-266	0.85146	3.70544e-11	0.565489	1.72853e-10	1.09919	5.56508e-88	0.693721	1186.18	3096.38	745.613	1383.35
ENSMUSG00000042662	Dusp15	3.13907	8.2827e-71	2.09091	2.34018e-07	0.0549828	0.942579	1.05722	5.01415e-10	0.483587	27.8869	245.586	24.0346	107.824
ENSMUSG00000015312	Gadd45b	2.95335	4.83521e-271	2.41439	5.29434e-24	0.537997	0.0922384	1.04833	1.27462e-34	0.68827	127.693	991.728	80.3835	444.462
ENSMUSG00000024164	C3	6.57247	0	6.15246	2.83818e-154	0.58583	0.117893	1.00831	2.96098e-129	0.747421	54.0504	5160.58	34.9614	2404.03
ENSMUSG00000044786	Zfp36	2.33148	4.05739e-192	1.36869	2.59027e-09	0.0417263	0.909148	1.0026	4.06069e-29	0.513064	167.239	844.585	154.277	399.959
ENSMUSG00000027995	Tlr2	6.18427	0	5.5252	2.00939e-61	0.362931	0.620725	1.00016	4.32187e-46	0.633283	21.1806	1553.05	15.0299	724.198
ENSMUSG00000079362	Gbp6	6.38115	4.44507e-166	6.04433	1.91143e-26	0.695337	0.511457	0.974811	5.40131e-24	0.79178	8.63466	722.503	4.34721	344.324
ENSMUSG00000026483	Fam129a	1.11861	5.43546e-42	0.6467	0.0046935	0.456143	0.00596998	0.924272	9.561e-18	0.721008	261.711	570.622	177.904	286.137
ENSMUSG00000024778	Fas	1.08862	5.5308e-58	0.82841	7.66634e-05	0.631043	6.85715e-05	0.887725	2.513e-22	0.834967	366.555	782.564	215.52	396.898
ENSMUSG00000031880	Rrad	2.16766	6.55957e-39	2.09565	3.79132e-06	0.772269	0.0941925	0.88686	6.4561e-06	0.951313	40.5743	183.056	20.8309	98.1734
ENSMUSG00000079363	Gbp4	5.59503	2.962e-81	4.40565	7.38005e-15	-0.382735	0.756109	0.855808	2.9361e-08	0.438489	5.77953	282.42	7.79115	141.513
ENSMUSG00000050737	Ptges	1.84761	5.43408e-60	0.839713	0.00242629	-0.157407	0.559896	0.850328	1.00438e-09	0.49727	105.799	382.517	110.954	203.962
ENSMUSG00000047878	A4galt	1.80748	1.10918e-28	1.56738	0.000907516	0.550927	0.23333	0.846499	3.79986e-05	0.846687	48.6766	170.879	29.0143	95.1074
ENSMUSG00000022587	Ly6e	2.38575	2.3896e-240	1.63712	3.92393e-15	0.0765456	0.813435	0.832745	2.25621e-25	0.595167	194.993	1022.94	174.875	549.148
ENSMUSG00000020866	Cacna1g	1.10018	1.34478e-18	0.485823	0.248104	0.196055	0.471269	0.828274	7.7335e-07	0.65322	108.807	234.302	86.7751	128.454
ENSMUSG00000025227	Tmem180	1.03183	3.76185e-25	0.627213	0.0338402	0.410914	0.0385063	0.828173	6.38114e-10	0.755438	179.187	367.803	122.417	198.316
ENSMUSG00000022951	Rcan1	1.3436	1.99197e-133	0.813701	2.08247e-07	0.284229	0.0858161	0.800815	2.54554e-35	0.692605	597.766	1522.54	459.435	820.138
ENSMUSG00000032690	Oas2	5.71103	1.36976e-35	3.76457	1.7273e-07	-1.06121	*	0.799829	0.000625182	0.259451	2.40288	126.618	4.33135	69.5302
ENSMUSG00000004110	Cacna1e	1.35224	2.98554e-14	1.24829	0.00559544	0.682917	0.0654176	0.783573	0.000593057	0.93048	53.5784	137.271	31.3642	76.225
ENSMUSG00000012428	Steap4	5.38136	0	5.10844	2.79646e-93	0.502219	0.279993	0.771094	6.73703e-36	0.827644	47.0335	1973.36	30.4177	1091.38
ENSMUSG00000021281	Tnfaip2	5.4024	0	4.45416	2.05112e-252	-0.176261	0.386621	0.766998	1.32439e-88	0.518266	192.611	8168.55	199.245	4539.21
ENSMUSG00000074896	Ifit3	7.63537	0	7.29406	2.27969e-91	0.419661	0.541251	0.762568	6.43556e-44	0.789324	17.4836	3486.63	11.7945	1964.81
ENSMUSG00000019256	Ahr	1.06789	1.4138e-44	0.873984	1.9384e-05	0.563948	0.000160755	0.739495	3.12139e-13	0.874238	291.776	614.372	181.512	339.541
ENSMUSG00000030921	Trim30a	5.73109	0	5.47291	2.37324e-59	0.489423	0.410207	0.721282	8.91438e-23	0.836146	23.3116	1242.18	15.2009	698.169
ENSMUSG00000031103	Elf4	1.50783	3.50795e-69	1.2185	1.82801e-09	0.41485	0.0398042	0.704026	4.58847e-12	0.818278	208.431	595.107	145.908	348.405
ENSMUSG00000039616	Mocos	1.77303	1.83286e-17	1.64935	0.00172344	0.550681	0.276163	0.693469	0.00806346	0.917845	30.5761	104.863	19.4127	63.9303
ENSMUSG00000096727	Psmb9	3.4575	4.45301e-82	3.02447	1.03875e-13	0.216363	0.753204	0.68367	2.87909e-05	0.740701	22.5463	248.234	19.1241	151.28
ENSMUSG00000038213	Tapbpl	1.41863	2.6791e-33	0.877794	0.0199792	0.172906	0.676239	0.680596	6.66432e-06	0.687372	106.717	286.219	90.7249	164.443
ENSMUSG00000057596	Trim30d	4.19962	3.0147e-263	3.54534	4.67535e-44	0.0364137	0.944701	0.671866	2.44276e-13	0.635393	41.9309	773.982	37.9883	451.35
ENSMUSG00000036661	Dennd3	1.89187	6.85436e-39	1.25364	0.00312143	0.0554189	0.929047	0.67119	0.000103667	0.642499	57.7917	215.479	49.4537	125.488
ENSMUSG00000029298	Gbp9	4.82523	0	4.22315	2.19614e-57	0.0381151	0.950068	0.656844	1.36173e-15	0.658807	34.4878	982.814	32.7181	586.851
ENSMUSG00000016496	Cd274	3.883	1.11215e-87	3.69273	1.86223e-16	0.495336	0.481068	0.65403	5.41064e-05	0.87644	17.5371	259.047	11.4703	151.11
ENSMUSG00000038178	Slc43a2	1.60421	4.91936e-168	1.31819	2.4277e-18	0.383648	0.00160076	0.647211	1.71355e-17	0.820159	495.927	1513.94	351.31	893.473
ENSMUSG00000034459	Ifit1	8.07485	7.01202e-288	7.76613	1.95706e-58	0.241794	0.842139	0.646262	1.43469e-30	0.807362	8.84003	2391.85	7.63603	1443.62
ENSMUSG00000023067	Cdkn1a	1.03956	5.33897e-296	0.648697	4.95225e-08	0.245933	0.0398317	0.62506	6.33516e-67	0.762672	3369.25	6953.2	2638.44	4236.16
ENSMUSG00000040253	Gbp7	3.76969	0	3.50414	1.20133e-152	0.345242	0.0402851	0.598819	2.76728e-40	0.831884	268.597	3678.62	197.955	2278
ENSMUSG00000090942	F830016B08Rik	6.57579	7.92678e-38	6.3264	6.86881e-08	0.427346	*	0.597458	0.00371325	0.841252	1.84065	173.176	1.12955	104.203
ENSMUSG00000024339	Tap2	1.9341	1.0663e-139	1.57155	1.53676e-18	0.225001	0.233747	0.593049	3.68646e-11	0.777791	206.72	793.122	165.444	505.373
ENSMUSG00000000386	Mx1	8.58258	1.6346e-30	6.63173	1.07373e-12	-1.42139	*	0.579711	8.69417e-05	0.258664	0.796308	309.115	2.10591	197.575
ENSMUSG00000054072	Iigp1	8.19892	1.71534e-156	7.35426	1.09581e-41	-0.254258	0.849804	0.577882	1.1209e-16	0.556843	4.66204	1362.45	5.17038	862.486
ENSMUSG00000023341	Mx2	5.64369	7.28536e-137	5.25121	2.75992e-27	0.189554	0.860904	0.555066	3.61811e-06	0.761819	9.69101	483.97	8.25265	298.645
ENSMUSG00000024308	Tapbp	1.53371	1.34648e-292	1.39408	4.71547e-36	0.410579	1.47387e-05	0.548498	4.54058e-28	0.907755	944.518	2744.98	658.641	1777.94
ENSMUSG00000056116	H2-T22	2.4658	5.05448e-82	2.31002	3.98309e-13	0.359207	0.377404	0.538645	0.000225724	0.897646	59.5503	329.897	41.6973	221.206
ENSMUSG00000039519	Cyp7b1	1.65006	1.36229e-24	1.51369	7.46641e-05	0.41149	0.291092	0.537635	0.00733018	0.909801	52.5445	165.638	35.5049	105.683
ENSMUSG00000073411	H2-D1	2.43427	1.20757e-185	1.92565	4.81263e-13	-0.0106782	0.983973	0.533216	3.65986e-09	0.702898	154.63	840.173	146.788	560.968
ENSMUSG00000020806	Rhbdf2	2.3608	7.70655e-97	2.1288	1.82545e-17	0.291071	0.432627	0.532967	4.86306e-06	0.851453	89.2915	460.52	69.6284	303.569
ENSMUSG00000037405	Icam1	4.5157	0	3.71607	1.47813e-61	-0.288461	0.475831	0.514458	1.14863e-09	0.574497	48.286	1106.77	53.2732	746.847
ENSMUSG00000018459	Slc13a3	1.20774	5.62665e-76	0.596672	0.0246695	-0.0732906	0.830453	0.508041	2.94334e-09	0.654712	395.127	916.246	388.633	595.003
ENSMUSG00000031779	Ccl22	11.7191	7.54415e-22	8.38396	9.93188e-11	-2.8281	*	0.499686	9.66018e-05	0.0990887	0	375.243	0.976358	246.206
ENSMUSG00000041801	Phlda3	1.11461	4.5011e-157	0.609874	7.82039e-06	-0.0179116	0.912396	0.498718	6.86322e-19	0.704789	1058	2300.11	987.577	1555.95
ENSMUSG00000024338	Psmb8	3.26905	5.26003e-170	3.02901	1.59486e-32	0.251321	0.498107	0.496174	5.75268e-06	0.846719	55.1489	534.363	42.8326	361.715
ENSMUSG00000028525	Pde4b	1.57084	3.33713e-304	1.04016	8.36449e-19	-0.0303932	0.841118	0.490441	5.06216e-21	0.692232	892.801	2662.51	849.773	1786.49
ENSMUSG00000037225	Fgf2	1.61345	1.69343e-33	1.06328	0.000867689	-0.0407481	0.913708	0.484062	0.00497655	0.68294	75.414	231.765	70.7529	150.055
ENSMUSG00000078853	Igtp	4.45415	0	4.33651	4.19938e-79	0.347503	0.333228	0.47388	1.58386e-10	0.921697	55.8275	1228.37	41.2416	844.923
ENSMUSG00000074141	Il4i1	2.95891	1.45802e-44	2.52773	3.87922e-08	0.0709948	0.928685	0.467195	0.0336315	0.741655	19.0235	148.758	15.7997	97.8637
ENSMUSG00000029561	Oasl2	7.25012	0	6.81533	2.17934e-148	0.0338777	0.955988	0.465867	3.2394e-20	0.739801	26.8777	4111.6	24.2411	2817.45
ENSMUSG00000032596	Uba7	4.1892	1.84478e-168	4.03508	1.88587e-35	0.31091	0.572402	0.46219	2.86126e-05	0.898675	26.498	485.335	19.3949	334.845
ENSMUSG00000045932	Ifit2	2.29475	0	1.65703	2.2177e-38	-0.171989	0.281624	0.458121	7.49494e-17	0.642731	449.319	2214.31	465.071	1515.3
ENSMUSG00000028341	Nr4a3	1.50527	1.39857e-19	0.599778	0.227723	-0.433108	0.228148	0.457581	0.0330773	0.533849	53.9182	153.918	69.7359	105.483
ENSMUSG00000026104	Stat1	4.24941	0	3.70022	1.8954e-170	-0.0899918	0.682744	0.457383	6.87477e-28	0.683401	261.565	4994.68	259.543	3440.52
ENSMUSG00000074170	Plekhf1	1.33386	5.37546e-55	1.13225	6.18521e-08	0.26485	0.189265	0.447316	5.32634e-05	0.869584	211.539	535.538	166.819	368.689
ENSMUSG00000061232	H2-K1	2.32681	0	2.24107	9.11386e-69	0.347671	0.0218546	0.439708	1.01419e-14	0.942302	480.023	2414.98	350.195	1701.2
ENSMUSG00000034457	Eda2r	1.06938	4.1066e-103	0.72746	2.63639e-09	0.101483	0.400431	0.439577	1.3473e-12	0.788992	793.71	1672.48	685.809	1166.26
ENSMUSG00000003617	Cp	1.92757	0	1.85432	5.22088e-101	0.367971	1.95227e-08	0.435174	6.3154e-44	0.95049	2483.81	9487.22	1780.9	6608.72
ENSMUSG00000040428	Plekha4	2.03673	1.47722e-208	1.55525	1.25434e-25	-0.0447589	0.822881	0.432398	1.4488e-08	0.716243	274.758	1132.48	263.57	794.321
ENSMUSG00000053175	Bcl3	1.27103	7.95217e-96	0.98632	9.81501e-07	0.144899	0.604803	0.431421	8.17945e-09	0.820907	446.306	1080.95	378.128	760.766
ENSMUSG00000037321	Tap1	2.86568	0	2.80673	1.26195e-74	0.363025	0.0704567	0.42615	1.74565e-11	0.959961	252.381	1844.26	183.51	1307.89
ENSMUSG00000027078	Ube2l6	2.48809	1.51633e-100	1.81446	2.84411e-13	-0.260449	0.428346	0.420043	0.000761565	0.626927	71.9525	404.994	82.4011	290.905
ENSMUSG00000033880	Lgals3bp	3.45117	0	3.4212	4.62717e-85	0.382938	0.0778426	0.418294	2.01078e-08	0.979443	150.991	1657.37	110.015	1185.06
ENSMUSG00000057367	Birc2	1.37435	8.70711e-125	1.33593	2.76088e-18	0.382078	0.01099	0.406706	1.28064e-08	0.973722	484.494	1262.12	340.371	886.881
ENSMUSG00000032265	Fam46a	1.87979	2.81216e-83	1.80623	3.39498e-13	0.33003	0.303229	0.405979	0.000477028	0.950285	136.753	505.054	103.91	362.662
ENSMUSG00000027962	Vcam1	2.31404	0	2.18613	7.89667e-132	0.287211	0.000249947	0.404201	3.89111e-49	0.915159	2973.62	14845.5	2265.25	10556
ENSMUSG00000005148	Klf5	1.19873	1.29391e-20	0.255462	0.776439	-0.57196	0.303736	0.397223	0.0197668	0.520053	101.261	233.399	141.147	170.795
ENSMUSG00000049502	Dtx3l	2.69833	0	2.56546	2.09538e-67	0.262178	0.145393	0.390037	4.9789e-09	0.912009	253.434	1653.33	197.49	1191.56
ENSMUSG00000019866	Aim1	1.71488	1.632e-33	1.48039	3.60574e-06	0.192976	0.579793	0.385825	0.0418416	0.849981	71.3461	234.947	57.8803	161.149
ENSMUSG00000028370	Pappa	1.09428	2.40287e-22	0.964023	0.000212134	0.261252	0.296473	0.384113	0.0100261	0.913672	140.967	302.49	108.498	217.834
ENSMUSG00000021025	Nfkbia	3.70738	0	3.63835	1.86671e-151	0.305621	0.101201	0.363841	7.69214e-16	0.953283	288.465	3779.69	216.5	2761.92
ENSMUSG00000018340	Anxa6	1.09259	0	0.982309	3.11404e-29	0.259558	5.91412e-05	0.36079	1.20527e-26	0.926411	4370.96	9359.4	3381.42	6850.84
ENSMUSG00000039497	Dse	1.27429	7.22378e-50	0.889306	1.08567e-05	-0.0104218	0.970801	0.356508	0.000949166	0.765788	228.803	555.117	210.882	401.82
ENSMUSG00000029798	Herc6	3.23317	0	2.81696	1.8981e-66	-0.0794459	0.789255	0.348557	1.06752e-07	0.749391	160.594	1519.12	158.552	1140.27
ENSMUSG00000022074	Tnfrsf10b	1.2642	7.38516e-37	0.695139	0.00459216	-0.198722	0.384302	0.344599	0.00811745	0.674056	163.936	395.587	178.154	289.051
ENSMUSG00000038507	Parp12	2.459	0	2.19592	4.20544e-45	0.0666665	0.748656	0.336705	1.37696e-05	0.833308	256.117	1413.32	225.24	1067.04
ENSMUSG00000048779	P2ry6	3.25716	1.27618e-118	2.89673	1.33901e-18	-0.0337066	0.963104	0.3353	0.0106895	0.778931	39.4359	377.837	38.9322	278.379
ENSMUSG00000032911	Cspg4	1.42552	0	1.22242	1.88587e-35	0.131638	0.151839	0.322257	7.14529e-14	0.868682	1352.94	3648.26	1146.41	2738.48
ENSMUSG00000000275	Trim25	2.80977	0	2.38522	1.4766e-72	-0.10637	0.549716	0.314017	1.08688e-07	0.745069	263.598	1855.79	263.536	1411.36
ENSMUSG00000025647	Shisa5	1.43796	4.66811e-194	1.113	1.21892e-14	-0.0201559	0.935609	0.301867	5.32775e-08	0.798321	721.698	1962.39	682.453	1506.03
ENSMUSG00000035929	H2-Q4	3.64437	1.24736e-132	2.8675	1.2044e-24	-0.502975	0.248658	0.300647	0.0229349	0.583631	32.0919	403.302	43.6774	316.289
ENSMUSG00000033355	Rtp4	6.04975	1.90624e-287	5.6226	3.59999e-72	-0.126957	0.873878	0.294808	6.56129e-05	0.743734	17.4213	1149.02	17.959	876.923
ENSMUSG00000046718	Bst2	3.97043	0	3.75652	5.92653e-71	0.0683896	0.860901	0.293668	0.00214075	0.862199	70.4389	1108.53	63.2731	867.696
ENSMUSG00000020400	Tnip1	1.91873	4.18678e-166	1.37482	8.54422e-15	-0.248163	0.290237	0.290318	0.000263854	0.685907	280.095	1063.81	312.198	819.75
ENSMUSG00000024539	Ptpn2	1.34544	4.62891e-82	0.806133	2.2004e-05	-0.232083	0.17946	0.286924	0.00348532	0.6881	311.047	793.676	343.448	608.873
ENSMUSG00000044350	Lacc1	1.1406	4.93195e-28	0.922932	4.60698e-05	0.0795832	0.76287	0.284496	0.0398983	0.859956	158.891	351.32	137.483	267.825
ENSMUSG00000023947	Nfkbie	3.66576	1.63617e-191	3.28189	2.11424e-42	-0.105664	0.811374	0.272124	0.00977556	0.76638	44.3009	565.192	44.1173	441.312
ENSMUSG00000026822	Lcn2	9.94759	0	9.89701	1.44181e-77	0.232399	0.86204	0.26505	3.61186e-10	0.965545	6.41118	6369.78	4.9994	5016.82
ENSMUSG00000026942	Traf2	1.26437	3.27472e-50	1.05957	7.50403e-09	0.0601708	0.799775	0.261659	0.0155427	0.867656	220.27	531.471	193.409	417.744
ENSMUSG00000034751	Mast4	1.20274	3.38546e-131	1.03836	3.307e-14	0.109697	0.463676	0.256313	8.56837e-05	0.892316	671.883	1553.01	579.615	1214.44
ENSMUSG00000052852	Reep1	1.14427	3.2592e-106	0.947072	6.94701e-13	0.0592299	0.687707	0.252356	0.0002176	0.872241	607.586	1348.3	543.162	1072.99
ENSMUSG00000027470	Mylk2	8.2795	5.3418e-56	6.43642	4.06444e-27	-1.60683	*	0.251741	0.0329851	0.278727	1.63139	501.313	4.6911	401.799
ENSMUSG00000002325	Irf9	2.21455	2.85638e-203	2.14484	7.13023e-46	0.189384	0.303277	0.247646	0.00245057	0.952834	233.312	1086.62	188.791	857.547
ENSMUSG00000018899	Irf1	3.26302	0	2.80437	3.42813e-58	-0.221674	0.406486	0.24127	0.000717985	0.72767	146	1407.06	154.575	1136.29
ENSMUSG00000047098	Rnf31	1.02053	3.2725e-42	0.862042	6.03383e-06	0.0803484	0.679762	0.239931	0.0285363	0.895963	306.633	624.378	271.987	507.351
ENSMUSG00000060802	B2m	1.70261	0	1.40067	2.20234e-17	-0.0659784	0.819998	0.228929	7.10752e-09	0.81116	1488.63	4864.78	1446.11	3909.41
ENSMUSG00000030107	Usp18	7.49506	2.86054e-162	7.34681	2.39986e-41	0.217405	0.888284	0.226422	0.00310462	0.902342	5.82916	1054.64	4.00526	851.931
ENSMUSG00000036718	Micall2	1.40855	9.00427e-106	1.24708	9.36161e-13	0.0794745	0.730351	0.208195	0.0170494	0.894112	361.914	964.966	321.236	770.169
ENSMUSG00000025492	Ifitm3	2.10053	0	1.56551	5.5236e-27	-0.340967	0.0346429	0.203907	0.00276054	0.690152	525.471	2261.04	619.19	1878.76
ENSMUSG00000039501	Znfx1	1.58719	1.25443e-253	1.47737	7.07716e-39	0.0193815	0.899348	0.129838	0.0299218	0.926703	668.927	2018.6	609.544	1747.81

## Sheet: Microglia
DEGs in which upregulation during T. gondii infection was impaired by CCR5-deficiency in microglia
*FDR was not calculated because no reads were mapped in some samples.
id	Symbol	uninfected WT vs infected WT		uninfected KO vs infected KO		uninfected WT vs uninfected KO		infected WT vs infected KO		Fold change between "uninfected WT vs infected WT" vs "uninfected KO vs infected KO"	mean iDEGES-normalized count
		log2FoldChange	FDR	log2FoldChange	FDR	log2FoldChange	FDR	log2FoldChange	FDR		uninfected WT	infected WT	uninfected KO	infected KO
ENSMUSG00000086196	Gm13571	3.82627	4.67521e-27	1.48486	0.00021798	-1.03692	0.156897	1.3093	7.53173e-08	0.197318	7.85429	109.314	15.9945	44.0246
ENSMUSG00000028214	Gem	1.48293	3.40579e-16	1.3176	1.25299e-05	0.876095	0.0085413	1.05285	1.617e-07	0.891725	61.1925	167.688	33.1653	81.8399
ENSMUSG00000032024	Clmp	3.30753	0	2.07464	2.37122e-76	-0.192317	0.339511	1.04639	3.02732e-43	0.425463	223.958	2177.72	253.236	1056.03
ENSMUSG00000020340	Cyfip2	1.10843	4.42646e-45	0.756673	2.14428e-09	0.624602	5.89181e-07	0.980478	1.70875e-29	0.783628	518.845	1098.34	333.48	556.357
ENSMUSG00000018916	Csf2	13.0285	2.40547e-27	10.8531	5.51674e-19	-1.20951	*	0.970293	7.97818e-11	0.22137	0	1369.51	0.46614	698.591
ENSMUSG00000063873	Slc24a3	2.07533	2.4875e-24	1.48446	6.59773e-08	0.311377	0.507911	0.908692	4.75965e-06	0.663946	43.9024	181.488	34.8721	97.2494
ENSMUSG00000021367	Edn1	5.07202	1.09799e-28	3.72253	3.44095e-15	-0.521796	0.72263	0.850066	0.000414418	0.39243	3.93503	129.955	5.63178	72.57
ENSMUSG00000029380	Cxcl1	7.72249	0	6.45276	3.26893e-54	-0.446652	0.521272	0.8195	1.44177e-08	0.414738	18.8632	3889.69	25.6036	2202.84
ENSMUSG00000038067	Csf3	10.0042	6.47123e-32	8.59364	2.93484e-30	-0.74828	*	0.789641	0.000275385	0.376156	0.917895	915.488	1.57851	529.892
ENSMUSG00000011008	Mcoln2	1.1197	1.15861e-58	1.09624	1.0655e-22	0.722961	3.21601e-11	0.752259	3.22793e-21	0.983866	618.446	1320.77	371.458	785.755
ENSMUSG00000050395	Tnfsf15	6.30398	1.14181e-243	5.28758	7.02002e-153	-0.287929	0.673632	0.732347	2.12916e-27	0.494348	19.9287	1548.68	24.0529	932.805
ENSMUSG00000025746	Il6	9.31057	0	8.92831	4.08471e-77	0.332272	0.754748	0.718277	8.47981e-40	0.767234	13.0409	8109.64	10.3567	4930.08
ENSMUSG00000031647	Mfap3l	3.18647	8.76922e-174	2.41466	2.76041e-58	-0.112296	0.75262	0.667525	3.67819e-12	0.585683	97.0744	865.71	104.005	547.304
ENSMUSG00000054708	Ankrd24	2.34792	2.14677e-118	1.55172	1.17321e-30	-0.137795	0.586551	0.662625	1.25949e-12	0.575867	154.136	769.865	167.61	486.734
ENSMUSG00000047867	Gimap6	3.25582	8.40757e-104	2.74683	6.6901e-41	0.104943	0.857443	0.633738	1.00931e-08	0.702714	51.669	482.978	48.1931	312.013
ENSMUSG00000085894	Gm15832	1.53738	3.61279e-27	1.48884	1.34855e-12	0.574649	0.0370081	0.629304	1.55419e-05	0.966919	99.2206	282.654	65.8905	183.559
ENSMUSG00000032487	Ptgs2	7.78188	0	6.72036	4.05543e-162	-0.470712	0.0116863	0.591948	0.000438887	0.479127	255.874	55209.6	351.277	36570.9
ENSMUSG00000045573	Penk	4.47515	1.5693e-148	4.1318	1.52649e-78	0.246187	0.705794	0.589742	1.27353e-07	0.788209	30.663	673.597	25.4783	447.594
ENSMUSG00000020178	Adora2a	7.10902	1.40125e-40	5.23628	7.57952e-40	-1.27761	0.359444	0.589565	2.2274e-05	0.273055	2.42958	327.745	5.79613	218.667
ENSMUSG00000005686	Ampd3	1.13481	6.50982e-92	1.03623	2.42933e-33	0.480078	1.85616e-07	0.583191	3.13721e-23	0.933954	1025.4	2211.07	725.506	1475.92
ENSMUSG00000018796	Acsl1	2.64915	0	2.32157	2.44677e-266	0.23003	0.0111718	0.561345	1.09395e-33	0.796875	1458.34	8974.6	1230.65	6082.02
ENSMUSG00000036528	Ppfibp2	3.20068	0	2.85403	3.59759e-198	0.200475	0.249864	0.54837	5.25857e-22	0.786406	295.419	2664.5	253.56	1821.5
ENSMUSG00000063568	Jazf1	2.11377	5.24093e-64	1.97051	2.3696e-30	0.387914	0.146785	0.539718	7.56019e-06	0.905467	107.678	457.724	81.685	315.93
ENSMUSG00000004267	Eno2	1.29278	1.38445e-16	1.04004	5.01043e-07	0.282242	0.356527	0.536953	0.00142173	0.8393	91.0327	219.288	74.0137	150.472
ENSMUSG00000024743	Syt7	6.83799	2.57022e-163	5.48037	7.00896e-137	-0.808279	0.230512	0.527212	2.17951e-13	0.390228	10.9321	1223.19	18.7026	850.347
ENSMUSG00000035164	Zc3h12c	2.36485	1.01024e-242	2.21276	2.16704e-111	0.366677	0.00818337	0.523168	3.96915e-16	0.899945	350.241	1770.82	268.627	1232.8
ENSMUSG00000015396	Cd83	2.11059	2.43763e-175	1.16796	1.59389e-28	-0.460444	0.000414063	0.486829	1.01534e-11	0.520284	329.881	1397.01	449.812	998.512
ENSMUSG00000026235	Epha4	2.4825	2.46891e-34	0.926929	1.46185e-05	-1.07309	0.000691546	0.480664	0.00590668	0.340194	36.3457	199.214	75.0328	143.131
ENSMUSG00000032691	Nlrp3	1.39158	9.4116e-149	1.3184	2.73314e-56	0.401909	2.76424e-06	0.480349	1.10554e-14	0.950537	1096.17	2825.28	819.774	2026.18
ENSMUSG00000026604	Ptpn14	1.63886	8.07876e-40	0.263375	0.102678	-0.901437	3.41087e-08	0.477025	9.81263e-05	0.385424	125.469	383.532	231.288	275.19
ENSMUSG00000033917	Gde1	1.33547	5.13861e-108	1.29433	4.65735e-37	0.414133	0.000139982	0.459239	1.44154e-10	0.971886	910.478	2254.56	676.045	1641.86
ENSMUSG00000021643	Serf1	1.19919	5.24775e-16	0.959986	8.03804e-06	0.19902	0.580364	0.445104	0.00443806	0.847211	117.929	265.719	102.057	195.186
ENSMUSG00000004296	Il12b	14.0408	6.33948e-42	11.589	5.09085e-96	-2.01175	*	0.444285	3.45111e-05	0.182788	0.616223	10010.8	2.43723	7351.32
ENSMUSG00000059588	Calcrl	1.1548	1.75987e-53	1.13088	1.78726e-19	0.41327	0.00377197	0.442729	8.8572e-08	0.983556	513.265	1122.45	380.71	827.038
ENSMUSG00000018906	P4ha2	2.03145	2.11951e-146	1.49507	8.50392e-40	-0.0998439	0.639134	0.440617	9.84012e-10	0.689501	285.928	1147.62	303.509	845.832
ENSMUSG00000038831	Ralgps1	1.97495	3.1594e-63	1.80991	4.85305e-30	0.240585	0.37625	0.411235	0.000489876	0.891905	124.17	479.739	103.557	361.796
ENSMUSG00000024878	Cbwd1	1.20653	1.01739e-16	1.04809	1.12155e-08	0.221958	0.442772	0.383194	0.0185413	0.895992	109.925	249.19	93.4828	190.433
ENSMUSG00000019256	Ahr	2.72702	0	2.41526	7.05512e-178	0.0661069	0.677478	0.382318	3.15833e-12	0.805656	620.565	4032.22	588.105	3093.96
ENSMUSG00000031488	Rab11fip1	3.17215	0	3.04419	3.75601e-283	0.236152	0.042908	0.36881	1.45772e-10	0.915123	631.434	5586.82	530.741	4326.87
ENSMUSG00000029378	Areg	5.38928	1.94024e-111	4.38335	4.08505e-81	-0.620098	0.355219	0.367695	0.000873756	0.49795	13.365	548.344	20.0747	425.575
ENSMUSG00000071757	Zhx2	1.89862	1.87498e-99	1.54838	5.63289e-41	-0.00217242	0.994492	0.351386	3.01761e-05	0.784452	231.468	848.06	228.815	664.003
ENSMUSG00000024597	Slc12a2	1.50199	1.47763e-56	1.01386	1.69183e-14	-0.144276	0.47909	0.350137	0.0012375	0.712949	278.092	773.001	305.62	608.748
ENSMUSG00000039232	Stx11	2.82601	4.54704e-107	2.29682	2.90427e-55	-0.187574	0.570375	0.343174	0.00122947	0.692943	81.8184	569.459	91.953	448.582
ENSMUSG00000054434	Tmem120b	1.36748	4.96826e-36	0.950189	1.00888e-11	-0.0818735	0.759677	0.341873	0.00294269	0.748827	179.675	454.967	189.059	359.527
ENSMUSG00000025757	Hspa4l	1.10324	6.7901e-113	1.00282	2.54965e-21	0.236369	0.0210478	0.34151	2.49475e-05	0.932757	1351.82	2851.8	1135.9	2252.4
ENSMUSG00000023868	Pde10a	3.23433	9.47182e-70	2.01419	1.91275e-27	-0.876802	0.0131073	0.334867	0.0172519	0.429242	36.1566	334.64	65.0362	266.088
ENSMUSG00000056592	Zfp658	1.46647	1.02331e-37	1.27993	1.51641e-21	0.142875	0.562281	0.331503	0.0043348	0.878709	184.53	500.702	164.712	397.803
ENSMUSG00000015312	Gadd45b	3.59137	2.83023e-241	3.56734	3.16202e-152	0.301329	0.311946	0.3284	9.30186e-05	0.983482	105.139	1246.07	84.2399	992.768
ENSMUSG00000093470	Gm20645	2.16939	1.62613e-206	1.85537	2.07623e-68	0.00378404	0.987276	0.323693	1.26481e-05	0.804397	380.302	1680.85	375.336	1345.41
ENSMUSG00000029822	Osbpl3	2.68883	3.18183e-269	2.15326	2.22583e-107	-0.21411	0.209973	0.32191	7.85857e-07	0.689885	257.597	1630.53	294.231	1302.81
ENSMUSG00000020275	Rel	2.23155	2.43316e-193	1.98341	4.38585e-78	0.0689657	0.739987	0.321841	5.554e-05	0.84198	319.036	1471.18	299.903	1178.67
ENSMUSG00000038151	Prdm1	2.32046	6.20278e-83	1.75039	4.96353e-31	-0.257058	0.347757	0.314999	0.00771315	0.673583	114.444	559.819	135.003	450.972
ENSMUSG00000079499	6530402F18Rik	5.44303	1.82852e-187	4.79358	8.62199e-133	-0.315747	0.613053	0.311219	0.000401389	0.637522	22.1018	943.851	26.7986	761.501
ENSMUSG00000025225	Nfkb2	2.65641	0	2.57448	4.08997e-203	0.223615	0.0520477	0.310285	7.07255e-08	0.944794	921.467	5700.96	780.527	4598.21
ENSMUSG00000058056	Palld	1.74987	1.44645e-217	1.48715	2.00359e-40	0.0408691	0.848282	0.310164	8.73755e-06	0.833514	852.138	2814.23	818.773	2271.67
ENSMUSG00000036206	Sh3bp4	2.62061	5.11421e-143	2.31924	6.13218e-75	0.00634887	0.985226	0.306332	0.000508128	0.811486	135.76	820.618	132.935	662.198
ENSMUSG00000019971	Cep290	1.1312	5.32705e-29	0.874012	2.46342e-11	0.0406951	0.871234	0.302869	0.0130236	0.836716	251.046	539.866	241.484	438.425
ENSMUSG00000004609	Cd33	1.07013	5.68254e-142	0.804927	5.03639e-31	0.0336555	0.772931	0.301928	4.43787e-10	0.83208	2236.34	4609.36	2161.29	3736.17
ENSMUSG00000055202	Zfp811	9.81301	1.01685e-30	7.31007	3.24283e-63	-2.35183	*	0.297777	0.000968798	0.176416	0.895461	801.181	4.70406	652.904
ENSMUSG00000024789	Jak2	3.03628	0	2.75213	3.21085e-259	0.00158713	0.992908	0.289607	8.7081e-08	0.821226	1123.48	9048.78	1111.11	7401.07
ENSMUSG00000025790	Slco3a1	6.77125	0	5.88323	0	-0.608361	0.0803194	0.277536	4.88567e-07	0.540354	40.705	4378.93	61.1934	3613.51
ENSMUSG00000017652	Cd40	4.6482	8.87394e-108	4.60872	5.77028e-76	0.250567	0.757754	0.276852	0.0300335	0.973008	19.7076	484.869	16.2436	398.511
ENSMUSG00000052144	Ppp4r2	1.12302	6.34863e-32	1.07047	8.14737e-15	0.217434	0.228953	0.274712	0.0289175	0.964231	276.392	591.334	234.134	489.13
ENSMUSG00000066152	Slc31a2	2.03979	0	2.01793	8.5879e-170	0.242987	0.00857153	0.26866	2.18819e-08	0.984966	1093.79	4415.16	913.747	3665.23
ENSMUSG00000037759	Ptger2	1.85566	4.7078e-85	1.74083	3.4428e-51	0.148079	0.50214	0.268481	0.00327267	0.923491	219.676	780.728	196.361	648.732
ENSMUSG00000026036	Nif3l1	1.07538	6.58692e-34	0.955381	1.01179e-15	0.142244	0.437303	0.267229	0.00905402	0.920186	334.418	691.582	298.275	575.789
ENSMUSG00000028347	Tmeff1	2.6715	4.74134e-121	2.64665	1.60397e-77	0.229064	0.43917	0.258569	0.00983705	0.982922	106.376	664.793	89.7966	555.915
ENSMUSG00000043336	Filip1l	2.32093	0	1.88683	5.21464e-123	-0.18882	0.0737352	0.249211	2.30646e-05	0.740153	908.2	4454.77	1024.97	3748.22
ENSMUSG00000037752	Xkr8	1.83238	1.24061e-57	1.64359	1.96996e-33	0.0540305	0.869721	0.247394	0.0335276	0.877339	142.503	497.245	135.984	419.067
ENSMUSG00000026942	Traf2	1.16423	2.13542e-37	1.04987	2.27469e-19	0.122854	0.538733	0.243301	0.0163307	0.923794	350.569	771.048	319.639	652.28
ENSMUSG00000039158	Akna	1.15394	1.38301e-104	0.883666	2.83343e-22	-0.0308029	0.865004	0.243108	1.47432e-05	0.829163	1378.16	3010.76	1390.59	2541
ENSMUSG00000035513	Ntng2	7.31488	5.24796e-111	6.22768	2.61719e-110	-0.816875	0.424498	0.242895	0.0180413	0.470676	6.36794	993.668	10.9678	840.688
ENSMUSG00000023106	Denr	1.53254	4.15093e-192	1.41168	1.83942e-77	0.112975	0.311887	0.237664	1.21195e-05	0.919639	1099.31	3123.91	1006.82	2647.87
ENSMUSG00000003863	Ppfia3	5.00504	6.54811e-134	4.53207	3.18625e-97	-0.228164	0.762868	0.234155	0.028411	0.720481	19.3831	610.114	22.3004	518.311
ENSMUSG00000028538	St3gal3	1.94727	1.61857e-131	1.73071	4.05505e-59	0.00997861	0.971673	0.23117	0.00281068	0.86062	317.332	1200.38	311.881	1022.4
ENSMUSG00000024785	Rcl1	1.92491	7.71245e-77	1.45858	4.49524e-33	-0.244849	0.235605	0.228186	0.0287593	0.723801	173.071	646.043	203.233	552.054
ENSMUSG00000045502	Niacr1	1.95583	0	1.66115	6.08762e-112	-0.0724307	0.571857	0.226285	2.57042e-05	0.815253	935.439	3563.55	971.277	3045.69
ENSMUSG00000032265	Fam46a	1.29	3.43598e-114	0.993852	6.99756e-22	-0.0802373	0.623018	0.219597	0.00112883	0.814421	1096.79	2634	1149.44	2262.16
ENSMUSG00000028517	Ppap2b	1.35321	2.0447e-74	0.886564	6.65932e-26	-0.256576	0.0196503	0.212964	0.00929749	0.723646	628.667	1576.63	741.725	1358.5
ENSMUSG00000066150	Slc31a1	1.32416	8.46638e-175	1.23415	4.21629e-63	0.113694	0.247913	0.207868	0.000220623	0.939521	1983.41	4876.48	1812.14	4222.63
ENSMUSG00000028163	Nfkb1	1.50291	3.22902e-287	1.36757	3.83911e-80	0.0679772	0.513298	0.207786	0.00019172	0.910452	1980.1	5509.15	1868.42	4770.57
ENSMUSG00000031429	Psmd10	1.15802	6.36568e-47	1.04838	5.75263e-25	0.0912904	0.609767	0.20472	0.0230722	0.926821	413.402	906.439	383.32	786.356
ENSMUSG00000030516	Tjp1	1.51592	2.4722e-182	1.39155	6.95519e-76	0.0696906	0.586248	0.198314	0.000459088	0.917406	947.105	2660.12	893.557	2318.19
ENSMUSG00000028525	Pde4b	3.68037	0	3.38322	2.60576e-199	-0.106492	0.674777	0.194229	0.00378045	0.813862	226.302	2848.91	241.062	2491
ENSMUSG00000048107	Kctd12	1.07924	9.98721e-185	1.04241	5.42498e-60	0.149283	0.0358348	0.190287	5.34506e-05	0.974796	5468.53	11345.7	4877.5	9940.15
ENSMUSG00000024143	Rhoq	1.00703	1.49027e-93	0.859709	6.08517e-30	0.0300157	0.823744	0.18146	0.00273694	0.902927	1719.21	3391.55	1664.26	2991.78
ENSMUSG00000042129	Rassf4	1.74274	7.3686e-288	1.24558	4.91914e-97	-0.32295	1.65042e-05	0.178129	2.36796e-05	0.708501	5320.56	17482.4	6581.92	15446.6
ENSMUSG00000038418	Egr1	2.93575	0	2.43117	3.82412e-155	-0.336085	0.0209744	0.170755	0.00800758	0.704867	339.403	2549	422.526	2263.3
ENSMUSG00000027074	Slc43a3	1.74049	2.17622e-150	1.55305	1.92591e-70	-0.0248273	0.901859	0.166004	0.0224526	0.878163	484.151	1588.45	486.12	1415.57
ENSMUSG00000035356	Nfkbiz	5.37457	0	4.9263	0	-0.2914	0.0794876	0.15715	0.00105022	0.732922	221.093	9005.96	266.811	8073.92
ENSMUSG00000027878	Notch2	1.2231	7.75604e-190	0.882293	5.35995e-37	-0.199711	0.0071629	0.145248	0.0143265	0.789601	4111.17	9420.68	4668.28	8515.36
ENSMUSG00000027660	Skil	1.79373	6.6554e-266	1.68902	2.13357e-79	0.0309211	0.866007	0.139641	0.0163577	0.929996	1300.03	4424.45	1260.48	4018.05
ENSMUSG00000027995	Tlr2	2.26997	0	1.96969	1.22207e-193	-0.176042	0.0300129	0.128352	0.012352	0.812094	2036.77	9645.56	2276.78	8824.23

## Sheet: Neuron
DEGs in which upregulation during T. gondii infection was impaired by CCR5-deficiency in neurons
*FDR was not calculated because no reads were mapped in some samples.
id	Symbol	uninfected WT vs infected WT		uninfected KO vs infected KO		uninfected WT vs uninfected KO		infected WT vs infected KO		Fold change between "uninfected WT vs infected WT" vs "uninfected KO vs infected KO"	mean iDEGES-normalized count
		log2FoldChange	FDR	log2FoldChange	FDR	log2FoldChange	FDR	log2FoldChange	FDR		uninfected WT	infected WT	uninfected KO	infected KO
ENSMUSG00000079168	Cd209g	1.60981	1.21656e-55	1.29417	1.15036e-08	0.219327	0.999807	0.523716	9.94901e-07	0.803493	212.928	673.536	177.06	463.277
ENSMUSG00000034258	Mfsd7c	1.28121	5.90753e-31	0.999452	3.78781e-05	0.186794	0.999807	0.46687	0.00215782	0.822588	195.075	491.54	157.213	355.14
ENSMUSG00000024399	Ltb	1.52709	9.84162e-27	1.45576	2.24832e-07	0.330599	0.999807	0.380908	0.0313779	0.951756	104.904	313.087	74.6171	238.337
ENSMUSG00000051906	Cd209f	1.20464	8.01475e-42	1.15081	6.04128e-18	0.327586	0.684638	0.369539	3.55179e-05	0.963373	614.017	1466.38	478.182	1120.75
ENSMUSG00000039899	Fgl2	1.44822	2.19299e-121	1.41156	1.75979e-36	0.289792	0.450774	0.313322	4.65904e-05	0.974909	1523.98	4304.43	1212.71	3422.92
ENSMUSG00000040723	Rcsd1	1.28435	3.63855e-43	1.12728	2.6934e-15	0.161911	0.999807	0.308301	0.00475212	0.896845	496.247	1253.3	439.567	997.121
ENSMUSG00000048498	Cd300e	2.27553	2.05595e-24	1.93863	6.5183e-36	-0.0255784	0.999807	0.266709	0.00502551	0.791743	303.561	1522.69	289.256	1249.1
ENSMUSG00000025225	Nfkb2	1.93235	5.55383e-111	1.87557	4.47535e-64	0.204791	0.999807	0.248085	0.00342535	0.961408	679.788	2689.78	572.536	2234.17
ENSMUSG00000022372	Sla	1.25511	4.45143e-15	1.16254	1.75979e-36	0.169262	0.999807	0.239731	0.00102096	0.937848	1662.44	4106.52	1425.32	3428.18
ENSMUSG00000024679	Ms4a6d	1.10933	5.47017e-58	0.911655	1.16295e-20	0.0529043	0.999807	0.233208	0.00245239	0.871955	1366.82	3053.88	1265.14	2561.21
