# Supplementary material for: Transcriptome analysis of the effect of C-C chemokine receptor 5 deficiency on cell response to Toxoplasma gondii in brain cells
Source: BMC Genomics. 2019 Sep 11;20:705. doi: 10.1186/s12864-019-6076-4 (PMC6737708; doi:10.1186/s12864-019-6076-4)
Supplement: Supplementary file 3 — Additional file 3: Table S3. Top10 KEGG pathways enriched in the DEGs in which upregulation during T. gondii infection was impaired by CCR5-deficiency in astrocytes and microglia. (XLSX 11 kb) [file 12864_2019_6076_MOESM3_ESM.xlsx]

## Sheet: Sheet1
Table S3. Top10 KEGG pathways enriched in the DEGs in which upregulation during infection was impaired by CCR5-deficiency in astrocytes and microglial cells.
Cell type	KEGG ID	FDR	Gene Ratio	Bg Ratio	Description	DEGs in pathway
Astrocyte	mmu05169	1.662e-13	20/69	230/8276	Epstein-Barr virus infection	Gadd45b, Tlr2, Fas, Oas2, Cdkn1a, Tap2, Tapbp, H2-T22, H2-T9, H2-D1, Icam1, Stat1, H2-K1, Tap1, Nfkbia, H2-Q4, Nfkbie, Traf2, Irf9, B2m
	mmu05168	7.77575e-10	16/69	215/8276	Herpes simplex infection	C3, Tlr2, Fas, Oas2, Ifit1, Tap2, H2-T22, H2-T9, H2-D1, Stat1, H2-K1, Tap1, Nfkbia, H2-Q4, Traf2, Irf9
	mmu05167	7.77575e-10	16/69	217/8276	Kaposi sarcoma-associated herpesvirus infection	C3, Zfp36, Fas, Rcan1, Cdkn1a, H2-T22, H2-T9, H2-D1, Icam1, Fgf2, Stat1, H2-K1, Nfkbia, H2-Q4, Traf2, Irf9
	mmu05170	2.68059e-08	15/69	239/8276	Human immunodeficiency virus 1 infection	Tlr2, Fas, Trim30d, Tap2, Tapbp, H2-T22, H2-T9, H2-D1, H2-K1, Tap1, Nfkbia, H2-Q4, Bst2, Traf2, B2m
	mmu04612	1.5047e-06	9/69	91/8276	Antigen processing and presentation	Tap2, Tapbp, H2-T22, H2-T9, H2-D1, H2-K1, Tap1, H2-Q4, B2m
	mmu05163	3.48979e-06	13/69	256/8276	Human cytomegalovirus infection	Fas, Cdkn1a, Tap2, Tapbp, H2-T22, H2-T9, H2-D1, H2-K1, Tap1, Nfkbia, H2-Q4, Traf2, B2m
	mmu04668	6.66275e-05	8/69	110/8276	TNF signaling pathway	Fas, Icam1, Bcl3, Birc2, Vcam1, Nfkbia, Traf2, Irf1
	mmu04621	0.000151769	9/69	168/8276	NOD-like receptor signaling pathway	Gbp2b, Oas2, Gbp7, Stat1, Birc2, Nfkbia, Traf2, Irf9, Rnf31
	mmu05164	0.000151769	9/69	168/8276	Influenza A	Fas, Oas2, Mx2, Icam1, Stat1, Nfkbia, Tnfrsf10b, Trim25, Irf9
	mmu05330	0.000173605	6/69	64/8276	Allograft rejection	Fas, H2-T22, H2-T9, H2-D1, H2-K1, H2-Q4
Microglia	mmu04657	7.46467e-05	7/48	91/8276	IL-17 signaling pathway	Csf2, Cxcl1, Csf3, Il6, Ptgs2, Traf2, Nfkb1
	mmu05134	7.46467e-05	6/48	58/8276	Legionellosis	Cxcl1, Il6, Il12b, Nfkb2, Nfkb1, Tlr2
	mmu04668	0.000159185	7/48	110/8276	TNF signaling pathway	Csf2, Edn1, Cxcl1, Il6, Ptgs2, Traf2, Nfkb1
	mmu04064	0.00114462	6/48	104/8276	NF-kappa B signaling pathway	Ptgs2, Gadd45b, Nfkb2, Cd40, Traf2, Nfkb1
	mmu05140	0.00116182	5/48	67/8276	Leishmaniasis	Ptgs2, Il12b, Jak2, Nfkb1, Tlr2
	mmu04625	0.00116182	6/48	112/8276	C-type lectin receptor signaling pathway	Il6, Ptgs2, Nlrp3, Il12b, Nfkb2, Nfkb1
	mmu05202	0.00171153	7/48	183/8276	Transcriptional misregulation in cancer	Csf2, Il6, Gadd45b, Rel, Cd40, Nfkb1, Nfkbiz
	mmu05132	0.00171153	5/48	78/8276	Salmonella infection	Csf2, Cxcl1, Il6, Nfkb1, Tjp1
	mmu05144	0.00325311	4/48	49/8276	Malaria	Csf3, Il6, Cd40, Tlr2
	mmu05167	0.00369928	7/48	217/8276	Kaposi sarcoma-associated herpesvirus infection	Csf2, Cxcl1, Il6, Ptgs2, Jak2, Traf2, Nfkb1
