# Supplementary material for: Transcriptome analysis of the effect of C-C chemokine receptor 5 deficiency on cell response to Toxoplasma gondii in brain cells
Source: BMC Genomics. 2019 Sep 11;20:705. doi: 10.1186/s12864-019-6076-4 (PMC6737708; doi:10.1186/s12864-019-6076-4)
Supplement: Supplementary file 10 — Additional file 10: Table S5. Primer sequences used in RT-qPCR. (XLSX 11 kb) [file 12864_2019_6076_MOESM10_ESM.xlsx]

## Sheet: Sheet1
Table S5. Primer sequences used in RT-qPCR.
Gene	Primer sequences (5’ to 3’)
Actb	Forward	GCTCTGGCTCCTAGCACCAT
	Reverse	GCCACCGATCCACACAGAGT
Adora2a	Forward	AAGGATTTTTTTGGCAGCCC
	Reverse	GGTTGGCTCTCCATCTGCTTC
C1qa	Forward	CTGGCATCCGGACTGGTATC
	Reverse	CAGATTCCCCTGGGTCTCCT
Ccl3	Forward	CCAGCCAGGTGTCATTTTCCT
	Reverse	TCCAAGACTCTCAGGCATTCAGT
Ccl4	Forward	CTCCAAGCCAGCTGTGGTATTC
	Reverse	CTCCAAGTCACTCATGTACTCAGTGA
Ccl5	Forward	CCAATCTTGCAGTCGTGTTTGT
	Reverse	CATCTCCAAATAGTTGATGTATTCTTGAAC
Ccr5	Forward	GACATCCGTTCCCCCTACAAG
	Reverse	TCACGCTCTTCAGCTTTTTGCAG
Dusp15	Forward	TCGCCTATGTGATGACGGTG
	Reverse	CTTCCAGCACTTCCTGCCA
Cd36	Forward	TTGTTCTTCCAGCCAATGCC
	Reverse	GGTTGTCTGGATTCTGGAGGG
Chi3l1	Forward	TCCAACCTTTCCTGTGCACC
	Reverse	TGCTGATGTTGGCAAAGCTG
Csf2	Forward	CCGCCTGAAGATATTCGAGC
	Reverse	TTGAGTTTGGTGAAATTGCCC
Csf3	Forward	CTGGCAGCAGATGGAAAACC
	Reverse	TGTGTGGGCTGCACAGTAGG
Cxcl1	Forward	CAATGAGCTGCGCTGTCAGT
	Reverse	TTGAGGTGAATCCCAGCCAT
Gbp4	Forward	CAGCCAAAGGTTTCCCTCTG
	Reverse	CTTCCCACAGACACGATCCA
Gbp5	Forward	TTCACATGCCAGAACCCTTG
	Reverse	CTAGGTGTCCCTCGGTGCTC
Gfap	Forward	GCCTCGGTCCTAGTCGACAA
	Reverse	GAGACAAGGAGAAGCGTGGC
Hmox1	Forward	TGCCCCAGGATTTGTCTGAG
	Reverse	TGTGTACCTCCTTGGTGGCC
Ifng	Forward	GAGGAACTGGCAAAAGGATG
	Reverse	TGAGCTCATTGAATGCTTGG
Irf4	Forward	AGACTGCCGGCTGCATATCT
	Reverse	TCTTTCACGAGGATGTCCCG
Mcoln2	Forward	TGCCCTCAAAGGAATTGACC
	Reverse	TCCGGTATCTCTCGGGAATG
Nfkb2	Forward	TTCAGAGTTGGGAGTGTGCG
	Reverse	GCAGTCATGTCCTTGGGTCC
Ptgs2	Forward	CCAGCACTTCACCCATCAGTT
	Reverse	CCCAGGTCCTCGCTTATGATC
Ptx3	Forward	AGCACTCGGAGTGGGACAAG
	Reverse	GCATCTGCGAGTTCTCCAGC
Saa3	Forward	GCCTGGGCTGCTAAAGTCAT
	Reverse	TGCTCCATGTCCCGTGAAC
Sla	Forward	GGCCGTTATCCAGCAGTGAG
	Reverse	TCAGCACAGCCAGGAAGTCA
Socs1	Forward	TTCTTGGTGCGCGACAGTC
	Reverse	AAGCCATCTTCACGCTGAGC
Spib	Forward	TGCAAGCCCTTCAGTTACCC
	Reverse	CCATGTAGAGTCAAGGCCCC
Tgfbi	Forward	AGCAGCTCTTCCGCTCTCAA
	Reverse	GATCCCACAACTCCCATGGT
Ube2ql1	Forward	TCTTCGACTGGAACGTGAAGC
	Reverse	ACAGCACCGAGTCCTTGTCC
